# Supplementary material for: Two-step phase transformation of anatase to rutile in aqueous suspension
Source: Royal Society of Chemistry journal article supplement (doi:10.1039/c3ce41820k), 2013-10-16
Supplement: c3ce41820k.pdf [file c3ce41820k.pdf]

Electronic Supplementary Information

# Two-Step Phase Transformation of Anatase to Rutile in Aqueous Suspension

**Kairat Sabyrov,<sup>a</sup> Vanessa Adamson<sup>a</sup> and R. Lee Penn<sup>\*,a</sup>**

<sup>a</sup> *Department of Chemistry, University of Minnesota, 207 Pleasant Street SE, Minneapolis,  
Minnesota, United States.*

*\* To whom correspondence should be addressed. Tel: +1 612 626 4680; E-*

*mail: rleepenn@umn.edu*

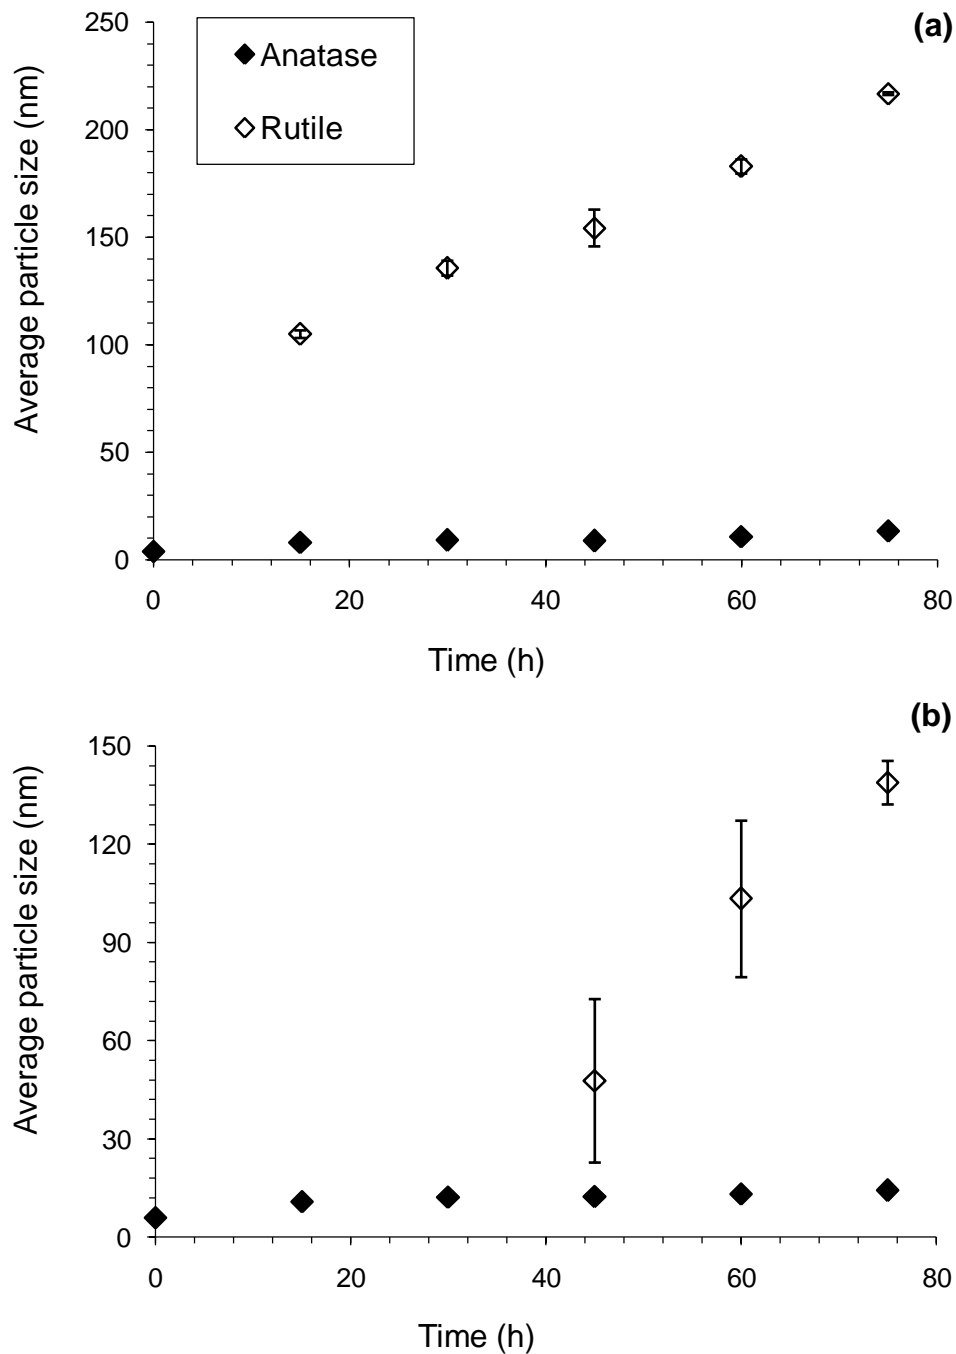

**ESI Fig.1** Plots showing average anatase and rutile sizes as a function of aging time for the samples initially containing 3.7 nm (a) and 6.0 nm (b) anatase. The sizes were determined by XRD peak broadening analysis using Scherrer equation.

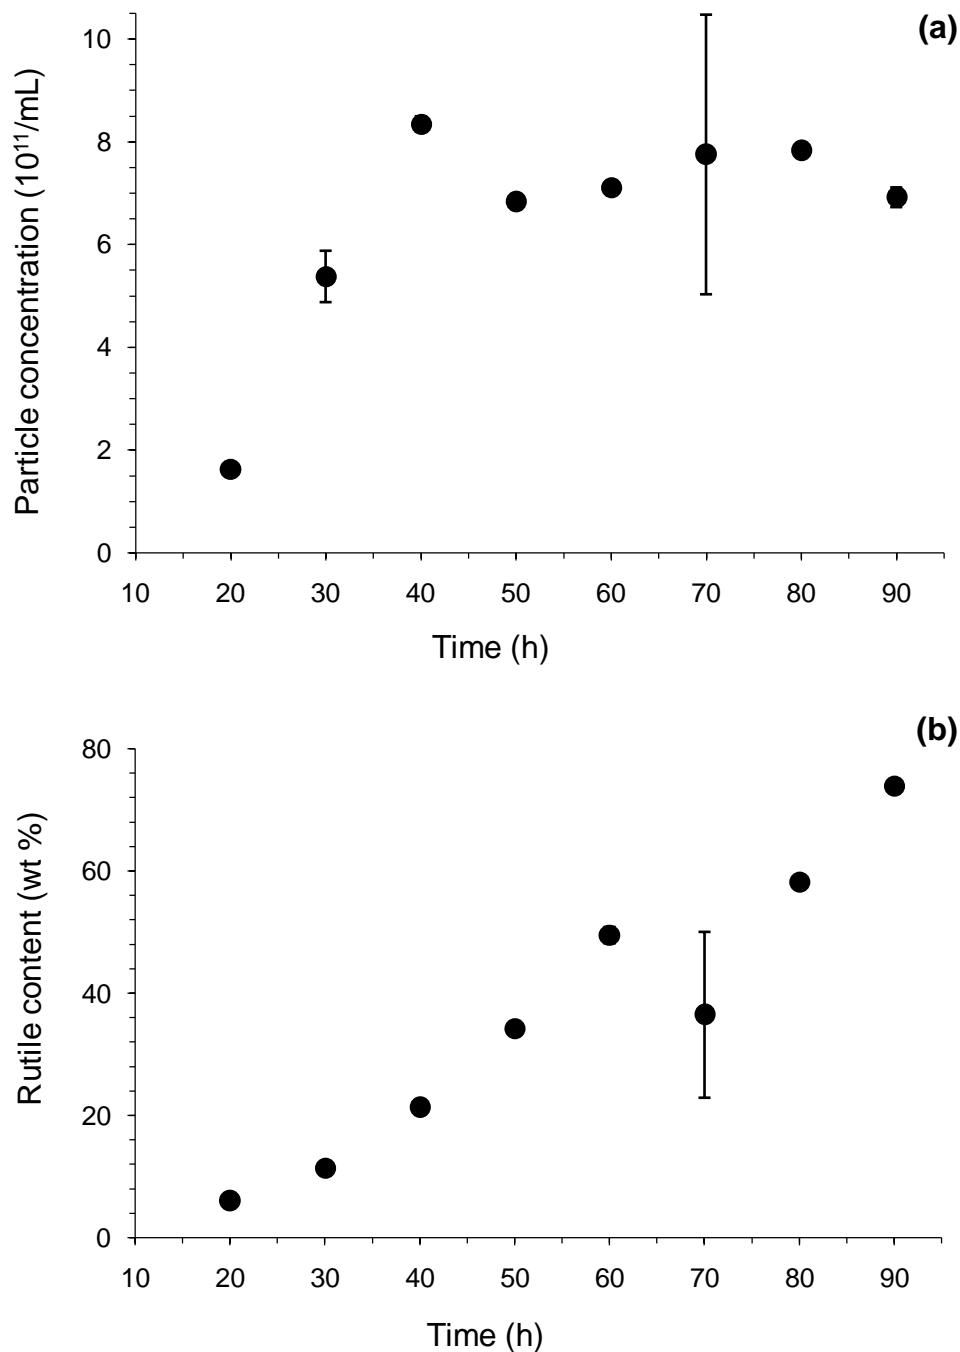

**ESI Fig.2** Plots showing number of rutile nanocrystals per mL of suspension (a) and rutile content (b) as a function of aging time for the sample initially containing 3.7 nm anatase. It should be noted that the calculated rutile number concentration is a rough estimate as it was calculated assuming rutile nanocrystals as spheres even though different shaped rutile nanocrystals were observed, including rod-shaped ones.
